# Supplementary material
Source: bioRxiv or medRxiv preprint supplement (https://www.biorxiv.org/content/biorxiv/early/2022/03/31/2022.03.29.486296.1/DC16/embed/media-16.pdf)
Supplement: Supplementary file [file media-16.pdf]

**Table S7. Taxa considered in the RelTime analyses**

| <b>Species</b>                            | <b>Strain or isolate; ptDNA GenBank accession</b> |
|-------------------------------------------|---------------------------------------------------|
| <i>Carteria crucifera</i>                 | UTEX 432; KT624880.1                              |
| <i>Chlamydomonas applanata</i>            | SAG 11-9; KT625417.1                              |
| <i>Hyalomonas chlamydogama</i>            | SAG 11-48b; Pending                               |
| <i>Chlamydomonas leiostraca</i>           | SAG 11-49; NC_032109.1                            |
| <i>Chlamydomonas reinhardtii</i>          | CC-125; BK000554.2                                |
| <i>Chlorella sorokiniana</i> <sup>1</sup> | Isolate 1230; KJ742376.1                          |
| <i>Chlorella variabilis</i> <sup>1</sup>  | NC64A; KJ718922.1                                 |
| <i>Chlorogonium capillatum</i>            | UTEX11; KT625090.1                                |
| <i>Chlorogonium euchlorum</i>             | SAG 12-2a; NNNNN                                  |
| <i>Chloromonas perforata</i>              | SAG 11-43; KT625416.1                             |
| <i>Chloromonas radiata</i>                | UTEX 966; KT625083.1                              |
| <i>Dunaliella salina</i>                  | CCAP 19/18; NC_016732.1                           |
| <i>Gonium pectorale</i>                   | K3-F3-4 (NIES-2863); NC_020438.1                  |
| <i>Haematococcus pluvialis</i>            | UTEX 2505; NC_037007.1                            |
| <i>Hyalogonium fusiforme</i>              | SAG 62-1c; Pending                                |
| <i>Microglena monadina</i>                | SAG 31.72; KT624802.1                             |
| <i>Oltmannsiellopsis viridis</i>          | NIES-360; NC_008099.1                             |
| <i>Oogamochlamys gigantea</i>             | SAG 44.91; NC_028580.1                            |
| <i>Pectinodesmus pectinatus</i>           | NA <sup>2</sup> ; KU847995.1                      |
| <i>Pleodorina starrii</i>                 | NIES-1363; NC_021109.1                            |
| <i>Hyalomonas oviformis</i>               | SAG 62-27; Pending                                |
| <i>Polytoma uvella</i>                    | UTEX 964; KX828177.1                              |
| <i>Schizomeris leibleinii</i>             | UTEX LB 1228; HQ700713.1                          |
| <i>Stigeoclonium helveticum</i>           | UTEX 441; DQ630521.1                              |
| <i>Tetrademus obliquus</i>                | DOE0152 (UTEX B 3031); CM007919.1                 |
| <i>Volvox carteri f. nagariensis</i>      | UTEX 2908; GU084820.1                             |

1. *Chlorella sorokiniana* and *Chlorella variabilis* were used as outgroup.  
2. NA; Strain information is not available in the corresponding GenBank record.  
Nonphotosynthetic species are indicated in shaded boxes.
